# Supplementary material for: Mechanical behaviour of hydrogenated nanoporous palladium
Source: Royal Society of Chemistry journal article supplement (doi:10.1039/d5cp00542f), 2025-01-01
Supplement: d5cp00542f1.pdf [file d5cp00542f1.pdf]

# Supplementary Material: Mechanical Behaviour of Hydrogenated Nanoporous Palladium

Schmidt, W. et al.

The Supplementary Material includes Figures S1-S5.

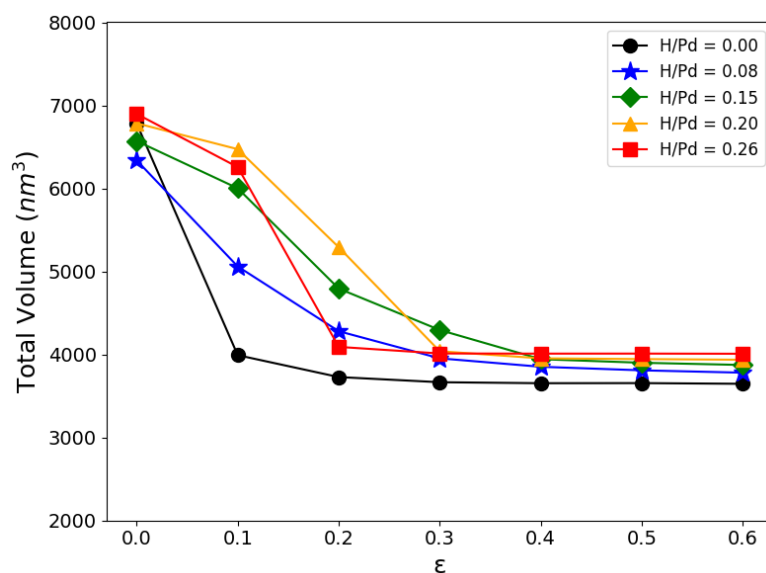

Figure S1: Total volume of the np Pd. Voids and solid volume are included.

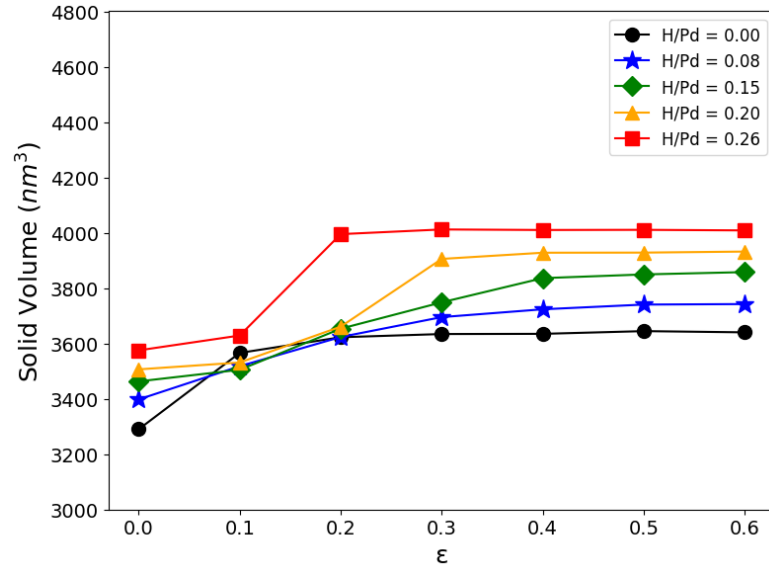

Figure S2: Solid volume of the np Pd. Voids are not included.

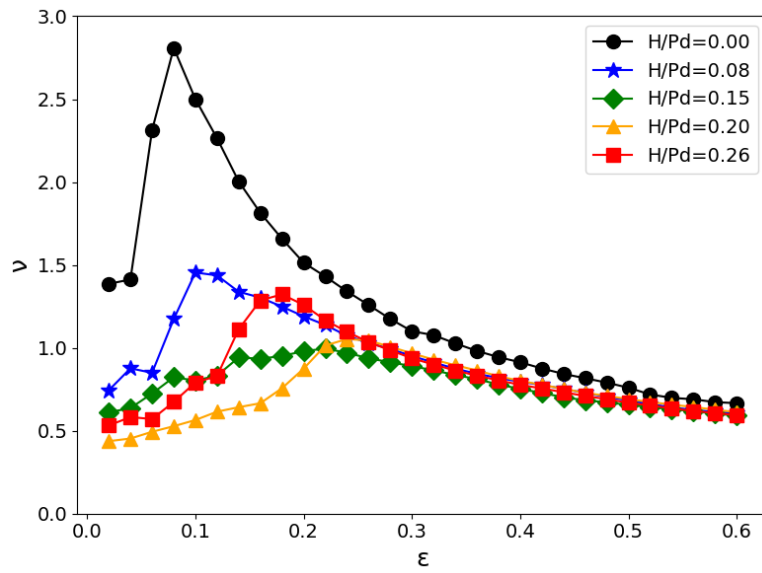

Figure S3: Poisson ratio during tensile test for different H content.

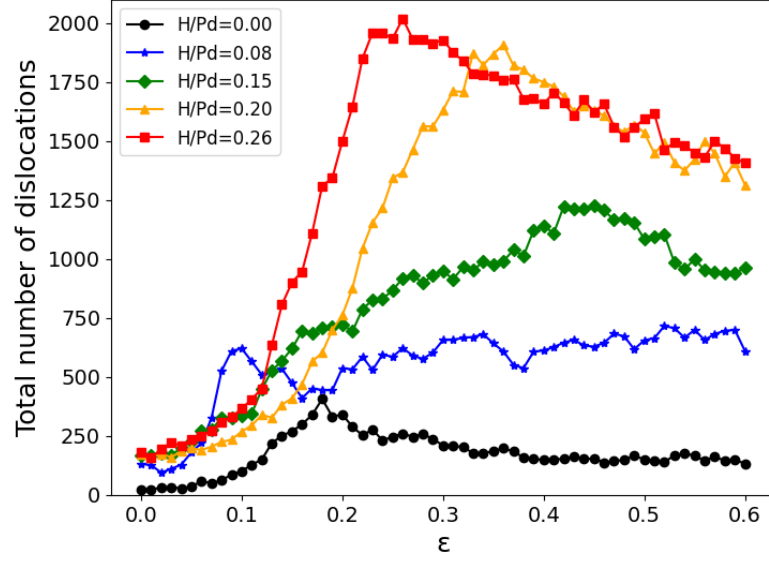

Figure S4: Number of dislocations segments at different H contents and strains.

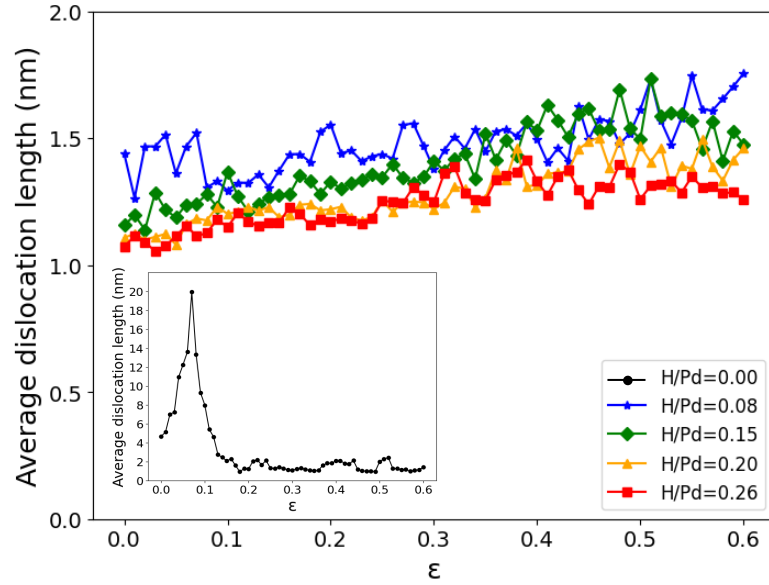

Figure S5: Average dislocation length as a function of the H/Pd concentration. The inset shows the curve for the non-hydrogenated case.
